# Supplementary material for: Distal Versus Proximal Radial Artery Access for Cardiac Catheterization: 30‐Day Outcomes of the DIPRA Study
Source: PubMed Central journal article supplement — J Am Heart Assoc. 2023 Oct 27;12(21):e030774. doi: 10.1161/JAHA.123.030774 (PMC10727396; doi:10.1161/jaha.123.030774), 2023-10-27
Supplement: JAH3-12-e030774-s001.pdf [file JAH3-12-e030774-s001.pdf]

# **SUPPLEMENTAL MATERIAL**

**Table S1. Deviations from the protocol follow-up window at 30 ± 10 days.**

| <b>Variable</b>                | <b>Distal (n=150)</b> | <b>Proximal (n=150)</b> |
|--------------------------------|-----------------------|-------------------------|
| Lost to Follow-up              | 22 (14.7%)            | 24 (16.0%)              |
| <b>30-day Follow-up Window</b> | <b>n=128</b>          | <b>n=126</b>            |
| Median Follow-up Time (days)   | 28 [23, 37]           | 30 [24, 40]             |
| <20 days                       | 1 (0.8%)              | 2 (1.6%)                |
| 30 ± 10 days                   | 104 (81.3%)           | 94 (74.6%)              |
| >40 days                       | 23 (18.0%)            | 30 (23.8%)              |

Values are frequency (%) or median [quartiles].

**Table S2. Summary of the mean and standard deviation for Quick DASH, pinch grip, and hand grip change simulated in 1000 Monte Carlo Simulations. A 10% ± 10% reduction was evaluated for each test.**

| Scenarios                                                                                                   | Mean from<br>1000 Monte<br>Carlo<br>Simulations | Quick DASH<br>Difference<br>(Post – Pre) |       | Pinch<br>Difference<br>(Post – Pre) |       | Grip<br>Difference<br>(Post – Pre) |       | Average Z-<br>Score |       |
|-------------------------------------------------------------------------------------------------------------|-------------------------------------------------|------------------------------------------|-------|-------------------------------------|-------|------------------------------------|-------|---------------------|-------|
|                                                                                                             |                                                 | dRA                                      | pRA   | dRA                                 | pRA   | dRA                                | pRA   | dRA                 | pRA   |
| <b>1:</b> 10% ± 10% reduction in dRA Hand Grip Strength and 0% ± 10% in all other measures with total n=250 | Mean                                            | -0.19                                    | -0.19 | 0                                   | 0.01  | 0                                  | -4.41 | 0.14                | -0.14 |
|                                                                                                             | SD                                              | 3.73                                     | 3.73  | 0.7                                 | 0.7   | 4.53                               | 4.66  | 0.69                | 0.69  |
| <b>2:</b> 10% ± 10% reduction in dRA Pinch Grip and 0% ± 10% in all other measures with total n=250         | Mean                                            | -0.19                                    | -0.19 | 0                                   | -0.67 | 0                                  | 0     | 0.14                | -0.14 |
|                                                                                                             | SD                                              | 3.73                                     | 3.73  | 0.70                                | 0.71  | 4.53                               | 4.53  | 0.69                | 0.69  |
| <b>3:</b> 10% ± 10% reduction in dRA Quick DASH Score and 0% ± 10% in all other measures with total n=250   | Mean                                            | -0.19                                    | -3.62 | 0                                   | 0.01  | 0                                  | 0     | 0.13                | -0.13 |
|                                                                                                             | SD                                              | 3.73                                     | 4.01  | 0.7                                 | 0.7   | 4.53                               | 4.53  | 0.68                | 0.70  |

DASH - Disabilities of the Arm, Shoulder, and Hand questionnaire; dRA – distal radial artery;  
pRA – proximal radial artery

**Table S3. Comparison of baseline characteristics between patients included vs. excluded. Patients excluded did not have a follow-up measurement at 30-days.**

| <b>Variable</b>                         | <b>Overall (n=300)</b> | <b>Excluded (n=46)</b> | <b>Included (n=254)</b> | <b>P</b> |
|-----------------------------------------|------------------------|------------------------|-------------------------|----------|
| <b>Baseline Patient Characteristics</b> |                        |                        |                         |          |
| Age (yrs)                               | 66.6 ± 9.6             | 63.5 ± 10.3            | 67.2 ± 9.4              | 0.03     |
| Sex                                     |                        |                        |                         | 0.42     |
| <i>Female</i>                           | 74 (24.7%)             | 14 (30.4%)             | 60 (23.6%)              |          |
| <i>Male</i>                             | 226 (75.3%)            | 32 (69.6%)             | 194 (76.4%)             |          |
| Diabetes Mellitus                       | 96 (32%)               | 14 (30.4%)             | 82 (32.3%)              | 0.94     |
| Hypercholesteremia                      | 56 (18.7%)             | 4 (8.7%)               | 52 (20.5%)              | 0.09     |
| Hypertension                            | 232 (77.3%)            | 37 (80.4%)             | 195 (76.8%)             | 0.72     |
| Prior Myocardial Infarction             | 39 (13%)               | 9 (19.6%)              | 30 (11.8%)              | 0.23     |
| Prior CABG                              | 6 (2%)                 | 1 (2.2%)               | 5 (2%)                  | 1        |
| Prior PCI                               | 56 (18.7%)             | 6 (13%)                | 50 (19.7%)              | 0.39     |
| <b>Baseline Hand Function</b>           |                        |                        |                         |          |
| Hand Grip (kg)                          |                        |                        |                         |          |
| <i>Left Hand</i>                        | 21.2 [15.6, 28.7]      | 21.3 [15.5, 28.7]      | 20.8 [15.8, 28.5]       | 0.72     |
| <i>Right Hand</i>                       | 26 [18.7, 32.8]        | 27.3 [17.9, 33.8]      | 25.5 [18.7, 32.7]       | 0.58     |
| Pinch Grip (kg)                         |                        |                        |                         |          |
| <i>Left Hand</i>                        | 6.8 [5.1, 8.4]         | 7.3 [5.1, 9.1]         | 6.8 [5, 8.2]            | 0.17     |
| <i>Right Hand</i>                       | 7.3 [5.4, 9]           | 7.7 [5.7, 9.1]         | 7.3 [5.3, 8.8]          | 0.31     |
| Quick DASH                              |                        |                        |                         |          |
| Score                                   | 4.6 [0, 15.9]          | 6.8 [0, 15.9]          | 4.6 [0, 13.6]           | 0.97     |

Values are frequency (%), mean ± standard deviation, or median [quartiles].

CABG – coronary artery bypass graft; DASH - Disabilities of the Arm, Shoulder, and Hand questionnaire; kg – kilogram; PCI – percutaneous coronary intervention

**Table S4. Hand and pinch grip strength at 30-days in the non-catheterization hand.**

| <b>Variable</b>                 | <b>Overall<br/>(n=254)</b> | <b>Distal<br/>(n=128)</b> | <b>Proximal<br/>(n=126)</b> | <b>P</b> |
|---------------------------------|----------------------------|---------------------------|-----------------------------|----------|
| <b>Hand Grip Strength (kg)</b>  |                            |                           |                             |          |
| <i>Baseline</i>                 | 20.8 [16, 28.5]            | 21.5 [16, 28]             | 20.3 [16, 28.7]             | 0.51     |
| <i>30-days</i>                  | 24 [17.1, 31.8]            | 26 [17, 33]               | 23.3 [17.3, 30.7]           | 0.35     |
| <i>Change from Baseline*</i>    | 2.5 [-1.3, 6.7]            | 2.7 [-1.3, 7.3]           | 2 [-1.3, 5.3]               | 0.49     |
| <b>Pinch Grip Strength (kg)</b> |                            |                           |                             |          |
| <i>Baseline</i>                 | 6.8 [5, 8.2]               | 7 [5, 8.3]                | 6.4 [5, 8]                  | 0.28     |
| <i>30-days</i>                  | 6.6 [4.8, 8.2]             | 6.7 [4.8, 8.2]            | 6.3 [4.8, 8.2]              | 0.98     |
| <i>Change from Baseline*</i>    | 0 [-1, 0.9]                | -0.1 [-1, 0.6]            | 0 [-1, 0.9]                 | 0.2      |

Values are median [quartiles].

kg – kilogram

\* Hand Grip and Pinch Grip Change were calculated as 30-days – baseline such that negative values indicate worsening.
